# Supplementary material
Source: PubMed Central journal article supplement (PMC4267718)
Supplement: NIHMS551168-supplement-01.pdf [file NIHMS551168-supplement-01.pdf]

## Childhood Food and Symptom Association Questionnaire

## Instructions:

The child and mother (or other primary caretaker) should have the questionnaire administered separately. See instructions below:  
Will be read aloud to the child/adolescent:

Some children feel that the certain foods can make them have belly problems like pain, throwing up, or diarrhea. I am going to name foods for you. If a food I name causes you to have belly pain or other belly problems – please raise your hand. I'll ask you a few questions about that food after you raise your hand. Do you understand?

“If you eat/drink X do you have any belly problems?”

“If you eat/drink Y do you have any belly problems?”

Will be read aloud to the parent:

Some parents notice that certain foods can cause their children to have belly problems, like pain, throwing up, or diarrhea. I am going to name foods for you. If a food I name causes your child to have belly pain or other belly problems – please raise your hand. I'll ask you a few questions about that food if you raise your hand. Do you understand?

“If your child eats/drinks X, does he/she have any belly problems?”

“If your child eats/drinks Y, does he/she have any belly problems?”

**Frequency of symptom correlation:**

- 1-Rarely, ~25% of the time or less
- 2-Sometimes, ~50% of the time
- 3-Often, ~75% of the time
- 4-Always, ~100% of the time (every time this food is consumed)

**Avoid:**

If subject restricts- write 'Y' for yes

| Food Item     | Type of Symptom | Severity of Symptom |      |     |          | Avoid<br>(Y/N) | Frequency of Symptom Correlation |           |       |        |
|---------------|-----------------|---------------------|------|-----|----------|----------------|----------------------------------|-----------|-------|--------|
|               |                 | Little              | Some | Bad | Very Bad |                | Rarely                           | Sometimes | Often | Always |
| Apples        |                 | 1                   | 2    | 3   | 4        |                | 1                                | 2         | 3     | 4      |
| Pears         |                 | 1                   | 2    | 3   | 4        |                | 1                                | 2         | 3     | 4      |
| Mangoes       |                 | 1                   | 2    | 3   | 4        |                | 1                                | 2         | 3     | 4      |
| Watermelons   |                 | 1                   | 2    | 3   | 4        |                | 1                                | 2         | 3     | 4      |
| Melons        |                 | 1                   | 2    | 3   | 4        |                | 1                                | 2         | 3     | 4      |
| Oranges       |                 | 1                   | 2    | 3   | 4        |                | 1                                | 2         | 3     | 4      |
| Grapefruits   |                 | 1                   | 2    | 3   | 4        |                | 1                                | 2         | 3     | 4      |
| Lemons        |                 | 1                   | 2    | 3   | 4        |                | 1                                | 2         | 3     | 4      |
| Peaches       |                 | 1                   | 2    | 3   | 4        |                | 1                                | 2         | 3     | 4      |
| Plums         |                 | 1                   | 2    | 3   | 4        |                | 1                                | 2         | 3     | 4      |
| Cherries      |                 | 1                   | 2    | 3   | 4        |                | 1                                | 2         | 3     | 4      |
| Nectarines    |                 | 1                   | 2    | 3   | 4        |                | 1                                | 2         | 3     | 4      |
| Bananas       |                 | 1                   | 2    | 3   | 4        |                | 1                                | 2         | 3     | 4      |
| Apricots      |                 | 1                   | 2    | 3   | 4        |                | 1                                | 2         | 3     | 4      |
| Grapes        |                 | 1                   | 2    | 3   | 4        |                | 1                                | 2         | 3     | 4      |
| Raisins       |                 | 1                   | 2    | 3   | 4        |                | 1                                | 2         | 3     | 4      |
| Berries       |                 | 1                   | 2    | 3   | 4        |                | 1                                | 2         | 3     | 4      |
| Fruit juices  |                 | 1                   | 2    | 3   | 4        |                | 1                                | 2         | 3     | 4      |
| Dried fruits  |                 | 1                   | 2    | 3   | 4        |                | 1                                | 2         | 3     | 4      |
| Other fruits: |                 | 1                   | 2    | 3   | 4        |                | 1                                | 2         | 3     | 4      |
| Onions        |                 | 1                   | 2    | 3   | 4        |                | 1                                | 2         | 3     | 4      |
| Broccoli      |                 | 1                   | 2    | 3   | 4        |                | 1                                | 2         | 3     | 4      |
| Cauliflower   |                 | 1                   | 2    | 3   | 4        |                | 1                                | 2         | 3     | 4      |
| Asparagus     |                 | 1                   | 2    | 3   | 4        |                | 1                                | 2         | 3     | 4      |
| Cabbage       |                 | 1                   | 2    | 3   | 4        |                | 1                                | 2         | 3     | 4      |
| Beans         |                 | 1                   | 2    | 3   | 4        |                | 1                                | 2         | 3     | 4      |
| Peas          |                 | 1                   | 2    | 3   | 4        |                | 1                                | 2         | 3     | 4      |

| Food Item                   | Type of Symptom | Severity of Symptom |      |     |          | Avoid (Y/N) | Frequency of Symptom Correlation |           |       |        |
|-----------------------------|-----------------|---------------------|------|-----|----------|-------------|----------------------------------|-----------|-------|--------|
|                             |                 | Little              | Some | Bad | Very Bad |             | Rarely                           | Sometimes | Often | Always |
| Tomatoes                    |                 | 1                   | 2    | 3   | 4        |             | 1                                | 2         | 3     | 4      |
| Corn                        |                 | 1                   | 2    | 3   | 4        |             | 1                                | 2         | 3     | 4      |
| Potatoes                    |                 | 1                   | 2    | 3   | 4        |             | 1                                | 2         | 3     | 4      |
| Brussel sprouts             |                 | 1                   | 2    | 3   | 4        |             | 1                                | 2         | 3     | 4      |
| Green or red peppers        |                 | 1                   | 2    | 3   | 4        |             | 1                                | 2         | 3     | 4      |
| Cooked vegetables           |                 | 1                   | 2    | 3   | 4        |             | 1                                | 2         | 3     | 4      |
| Raw vegetables              |                 | 1                   | 2    | 3   | 4        |             | 1                                | 2         | 3     | 4      |
| Other vegetables:           |                 | 1                   | 2    | 3   | 4        |             | 1                                | 2         | 3     | 4      |
| Milk (Cow's)                |                 | 1                   | 2    | 3   | 4        |             | 1                                | 2         | 3     | 4      |
| Soy Milk                    |                 | 1                   | 2    | 3   | 4        |             | 1                                | 2         | 3     | 4      |
| Ice Cream                   |                 | 1                   | 2    | 3   | 4        |             | 1                                | 2         | 3     | 4      |
| Cheese<br>Specify:          |                 | 1                   | 2    | 3   | 4        |             | 1                                | 2         | 3     | 4      |
| Creams<br>Specify:          |                 | 1                   | 2    | 3   | 4        |             | 1                                | 2         | 3     | 4      |
| Yogurt                      |                 | 1                   | 2    | 3   | 4        |             | 1                                | 2         | 3     | 4      |
| Butter                      |                 | 1                   | 2    | 3   | 4        |             | 1                                | 2         | 3     | 4      |
| Margarine                   |                 | 1                   | 2    | 3   | 4        |             | 1                                | 2         | 3     | 4      |
| Coconut milk/cream          |                 | 1                   | 2    | 3   | 4        |             | 1                                | 2         | 3     | 4      |
| BBQ sauce                   |                 | 1                   | 2    | 3   | 4        |             | 1                                | 2         | 3     | 4      |
| Ketchup                     |                 | 1                   | 2    | 3   | 4        |             | 1                                | 2         | 3     | 4      |
| Mayonnaise                  |                 | 1                   | 2    | 3   | 4        |             | 1                                | 2         | 3     | 4      |
| Salad dressings<br>Specify: |                 | 1                   | 2    | 3   | 4        |             | 1                                | 2         | 3     | 4      |
| Mustard                     |                 | 1                   | 2    | 3   | 4        |             | 1                                | 2         | 3     | 4      |
| Pancake syrup               |                 | 1                   | 2    | 3   | 4        |             | 1                                | 2         | 3     | 4      |
| Honey                       |                 | 1                   | 2    | 3   | 4        |             | 1                                | 2         | 3     | 4      |

| Food Item                         | Type of Symptom | Severity of Symptom |      |     |          | Avoid (Y/N) | Frequency of Symptom Correlation |           |       |        |
|-----------------------------------|-----------------|---------------------|------|-----|----------|-------------|----------------------------------|-----------|-------|--------|
|                                   |                 | Little              | Some | Bad | Very Bad |             | Rarely                           | Sometimes | Often | Always |
| Jellies/Jams<br>Specify:          |                 | 1                   | 2    | 3   | 4        |             | 1                                | 2         | 3     | 4      |
| Peanut Butter                     |                 | 1                   | 2    | 3   | 4        |             | 1                                | 2         | 3     | 4      |
| Sweet and sour sauce              |                 | 1                   | 2    | 3   | 4        |             | 1                                | 2         | 3     | 4      |
| Gravy                             |                 | 1                   | 2    | 3   | 4        |             | 1                                | 2         | 3     | 4      |
| Salsa                             |                 | 1                   | 2    | 3   | 4        |             | 1                                | 2         | 3     | 4      |
| Pork                              |                 | 1                   | 2    | 3   | 4        |             | 1                                | 2         | 3     | 4      |
| Sausage<br>Specify:               |                 | 1                   | 2    | 3   | 4        |             | 1                                | 2         | 3     | 4      |
| Hot dogs                          |                 | 1                   | 2    | 3   | 4        |             | 1                                | 2         | 3     | 4      |
| Ham                               |                 | 1                   | 2    | 3   | 4        |             | 1                                | 2         | 3     | 4      |
| Beef                              |                 | 1                   | 2    | 3   | 4        |             | 1                                | 2         | 3     | 4      |
| Turkey                            |                 | 1                   | 2    | 3   | 4        |             | 1                                | 2         | 3     | 4      |
| Chicken                           |                 | 1                   | 2    | 3   | 4        |             | 1                                | 2         | 3     | 4      |
| Fish                              |                 | 1                   | 2    | 3   | 4        |             | 1                                | 2         | 3     | 4      |
| Eggs                              |                 | 1                   | 2    | 3   | 4        |             | 1                                | 2         | 3     | 4      |
| Peanuts                           |                 | 1                   | 2    | 3   | 4        |             | 1                                | 2         | 3     | 4      |
| Other Nuts<br>Specify:            |                 | 1                   | 2    | 3   | 4        |             | 1                                | 2         | 3     | 4      |
| Pasta                             |                 | 1                   | 2    | 3   | 4        |             | 1                                | 2         | 3     | 4      |
| Pasta sauce                       |                 | 1                   | 2    | 3   | 4        |             | 1                                | 2         | 3     | 4      |
| Wheat bread                       |                 | 1                   | 2    | 3   | 4        |             | 1                                | 2         | 3     | 4      |
| Rye bread                         |                 | 1                   | 2    | 3   | 4        |             | 1                                | 2         | 3     | 4      |
| White bread                       |                 | 1                   | 2    | 3   | 4        |             | 1                                | 2         | 3     | 4      |
| Bagels                            |                 | 1                   | 2    | 3   | 4        |             | 1                                | 2         | 3     | 4      |
| Sourdough bread                   |                 | 1                   | 2    | 3   | 4        |             | 1                                | 2         | 3     | 4      |
| Cold breakfast cereal<br>Specify: |                 | 1                   | 2    | 3   | 4        |             | 1                                | 2         | 3     | 4      |

| Food Item                                | Type of Symptom | Severity of Symptom |      |     |          | Avoid (Y/N) | Frequency of Symptom Correlation |           |       |        |
|------------------------------------------|-----------------|---------------------|------|-----|----------|-------------|----------------------------------|-----------|-------|--------|
|                                          |                 | Little              | Some | Bad | Very Bad |             | Rarely                           | Sometimes | Often | Always |
| <b>Cookies</b>                           |                 | 1                   | 2    | 3   | 4        |             | 1                                | 2         | 3     | 4      |
| <b>Crackers</b>                          |                 | 1                   | 2    | 3   | 4        |             | 1                                | 2         | 3     | 4      |
| <b>Cakes</b>                             |                 | 1                   | 2    | 3   | 4        |             | 1                                | 2         | 3     | 4      |
| <b>Pizza</b>                             |                 | 1                   | 2    | 3   | 4        |             | 1                                | 2         | 3     | 4      |
| <b>Rice</b>                              |                 | 1                   | 2    | 3   | 4        |             | 1                                | 2         | 3     | 4      |
| <b>Pickles</b>                           |                 | 1                   | 2    | 3   | 4        |             | 1                                | 2         | 3     | 4      |
| <b>Sodas</b>                             |                 | 1                   | 2    | 3   | 4        |             | 1                                | 2         | 3     | 4      |
| <b>Diet Sodas</b>                        |                 | 1                   | 2    | 3   | 4        |             | 1                                | 2         | 3     | 4      |
| <b>Sports drinks</b>                     |                 | 1                   | 2    | 3   | 4        |             | 1                                | 2         | 3     | 4      |
| <b>Coffee</b>                            |                 | 1                   | 2    | 3   | 4        |             | 1                                | 2         | 3     | 4      |
| <b>Tea</b>                               |                 | 1                   | 2    | 3   | 4        |             | 1                                | 2         | 3     | 4      |
| <b>Alcohol</b>                           |                 | 1                   | 2    | 3   | 4        |             | 1                                | 2         | 3     | 4      |
| <b>Smoked foods</b><br>Specify:          |                 | 1                   | 2    | 3   | 4        |             | 1                                | 2         | 3     | 4      |
| <b>Deep-fried foods</b><br>Specify:      |                 | 1                   | 2    | 3   | 4        |             | 1                                | 2         | 3     | 4      |
| <b>Fried foods</b><br>Specify:           |                 | 1                   | 2    | 3   | 4        |             | 1                                | 2         | 3     | 4      |
| <b>Pastries</b>                          |                 | 1                   | 2    | 3   | 4        |             | 1                                | 2         | 3     | 4      |
| <b>Chocolate</b>                         |                 | 1                   | 2    | 3   | 4        |             | 1                                | 2         | 3     | 4      |
| <b>Non-chocolate candy</b>               |                 | 1                   | 2    | 3   | 4        |             | 1                                | 2         | 3     | 4      |
| <b>Sugar free chewing gum</b>            |                 | 1                   | 2    | 3   | 4        |             | 1                                | 2         | 3     | 4      |
| <b>Sugar chewing gum</b>                 |                 | 1                   | 2    | 3   | 4        |             | 1                                | 2         | 3     | 4      |
| <b>Spicy food/hot spices</b><br>Specify: |                 | 1                   | 2    | 3   | 4        |             | 1                                | 2         | 3     | 4      |
| <b>Fast Foods</b><br>Specify:            |                 | 1                   | 2    | 3   | 4        |             | 1                                | 2         | 3     | 4      |

## Demographic Data

1) Male/ Female

2) Height:

3) Weight:

4) Identified Race: White African American/Black Asian/Pacific Islander American Indian or Alaskan Native Other/Unknown

Hispanic: Yes No

5) Are there any foods that I did not mention that may cause you/your child to have belly problems?

6) Do all foods cause you/your child to have belly problems?
